# Supplementary material for: A muscle growth-promoting treatment based on the attenuation of activin/myostatin signalling results in long-term testicular abnormalities
Source: PubMed Central journal article supplement (PMC7903914; doi:10.1242/dmm.047555), 2021-02-19
Supplement: dmm-14-047555-s1.pdf [file dmm-14-047555-s1.pdf]

Supplementary Figure 1

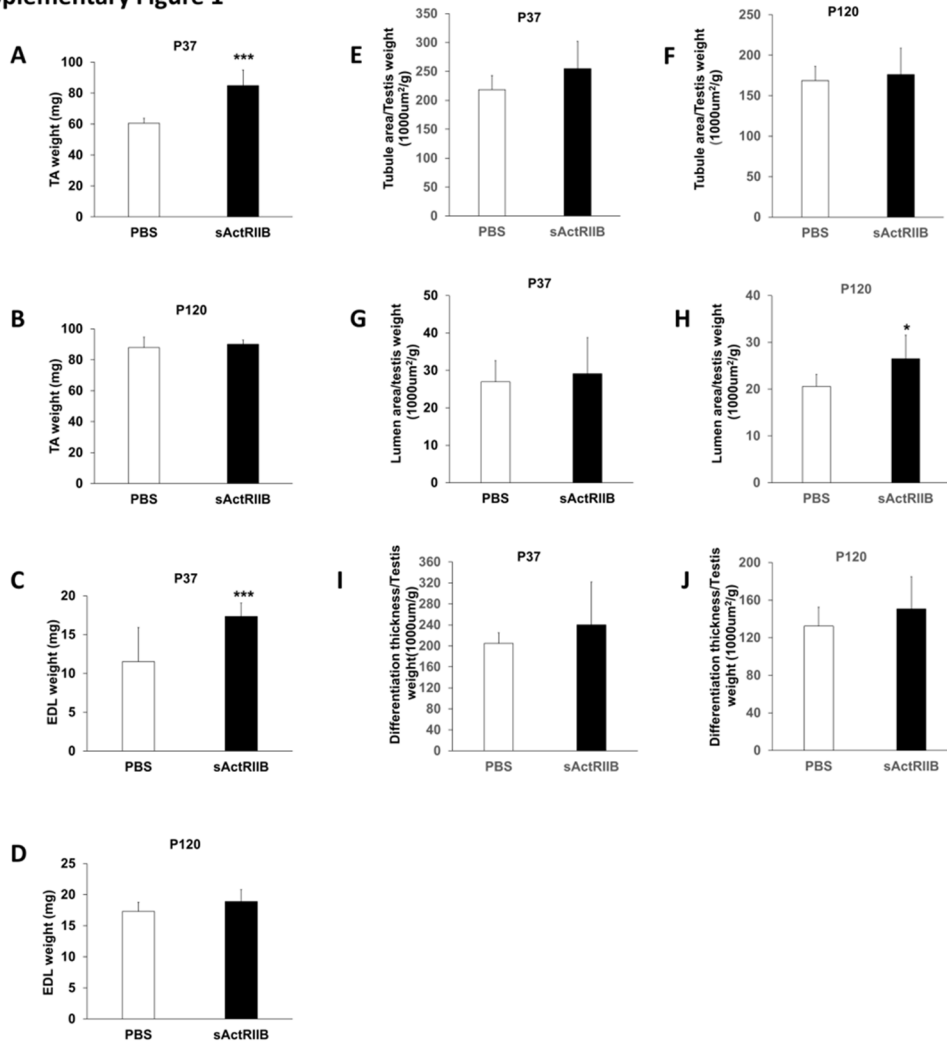

**Figure S1.** Muscle weights at day 37 and 120 for Tibialis Anterior (A-B) and EDL (C-D). Normalization of tubule area (E-F), lumen area (G-H) and differentiation thickness (I-J) to testis weight. For P37 experiments n=7 PBS treated male mice, n=7 sActRIIB treated male mice. For P120, n=4 PBS treated male mice, n=4 sActRIIB treated male mice. Student's t-Test used for statistical significance. \* $p < 0.05$ , \*\*\* $p < 0.001$ .

Supplementary Figure 2

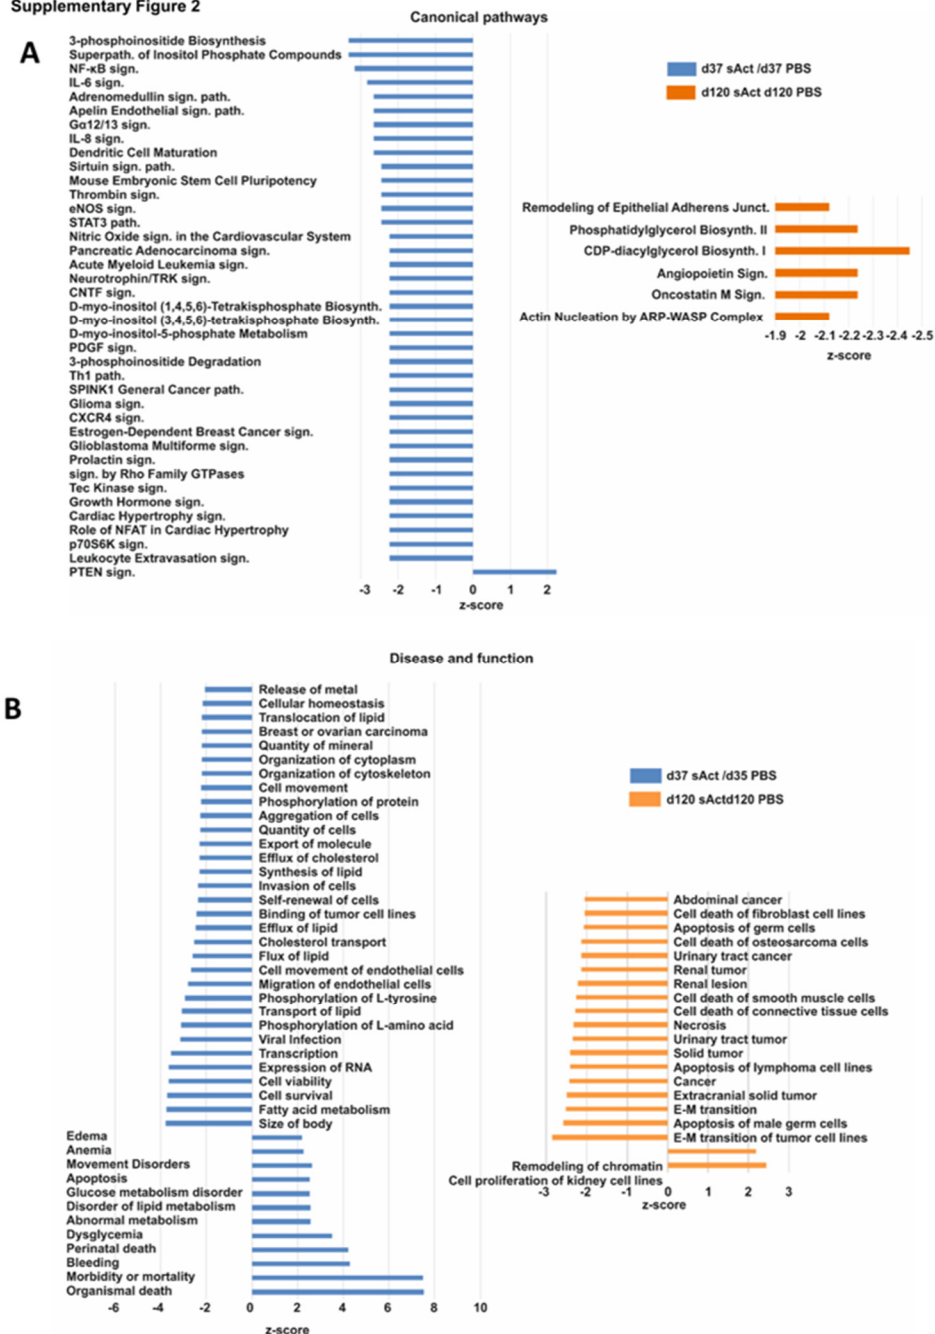

**Figure S2.** (A) Canonical pathways and (B) disease and associated functions sorting of pathways predicted to be differentially affected by sActRIIB treatment. The  $|z\text{-score}| \geq 2$  was used as a criterion for significant activation or inactivation of a given pathway or process. Here are the changes in canonical pathways and diseases and function indicators following comparison of teste gene expressions patterns for the impact of sActRIIB treatment at the two time points examined.

Supplementary Figure 3

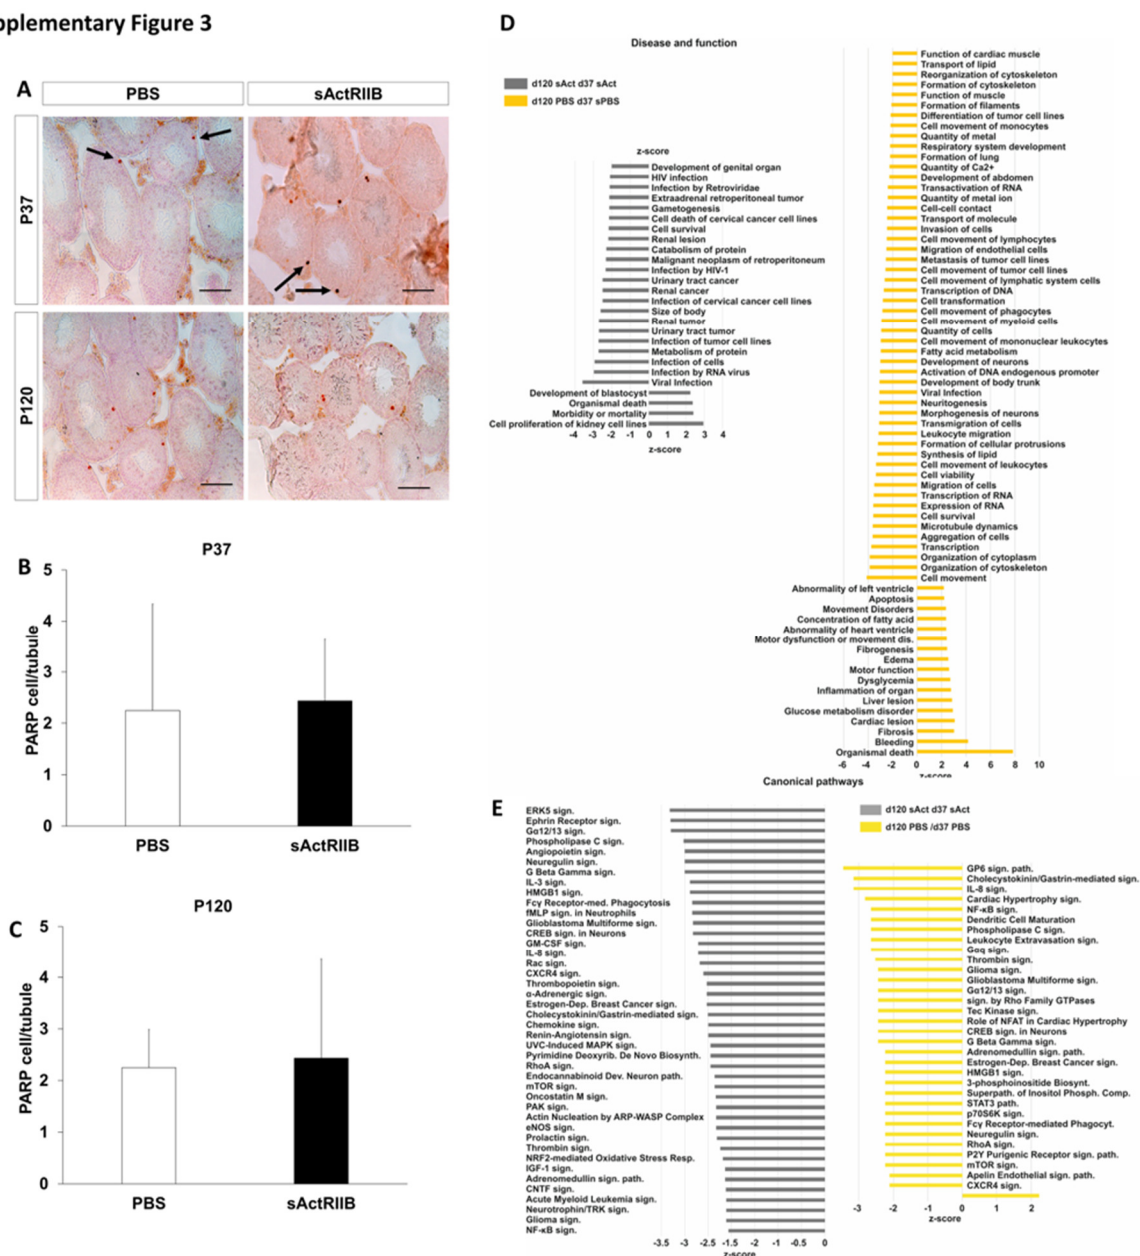

**Figure S3.** (A) Immunostaining for cleaved PPAR as a proxy for apoptosis in the testis (arrows). (B-C) Quantification of cleaved PPAR in testis of sActRIIB treated mice. For P37 experiments n=7 PBS treated male mice, n=7 sActRIIB treated male mice. For P120, n=4 PBS treated male mice, n=4 sActRIIB treated male mice. Student's t-Test used for statistical significance. Scale for all images represents 50µm. (D) Canonical pathways and (E) disease and associated functions sorting of pathways predicted to be differentially affected in the indicated experimental conditions. The  $|z\text{-score}| \geq 2$  was used as a criterion for significant activation or inactivation of a given pathway or process.

## Supplementary Figure 4

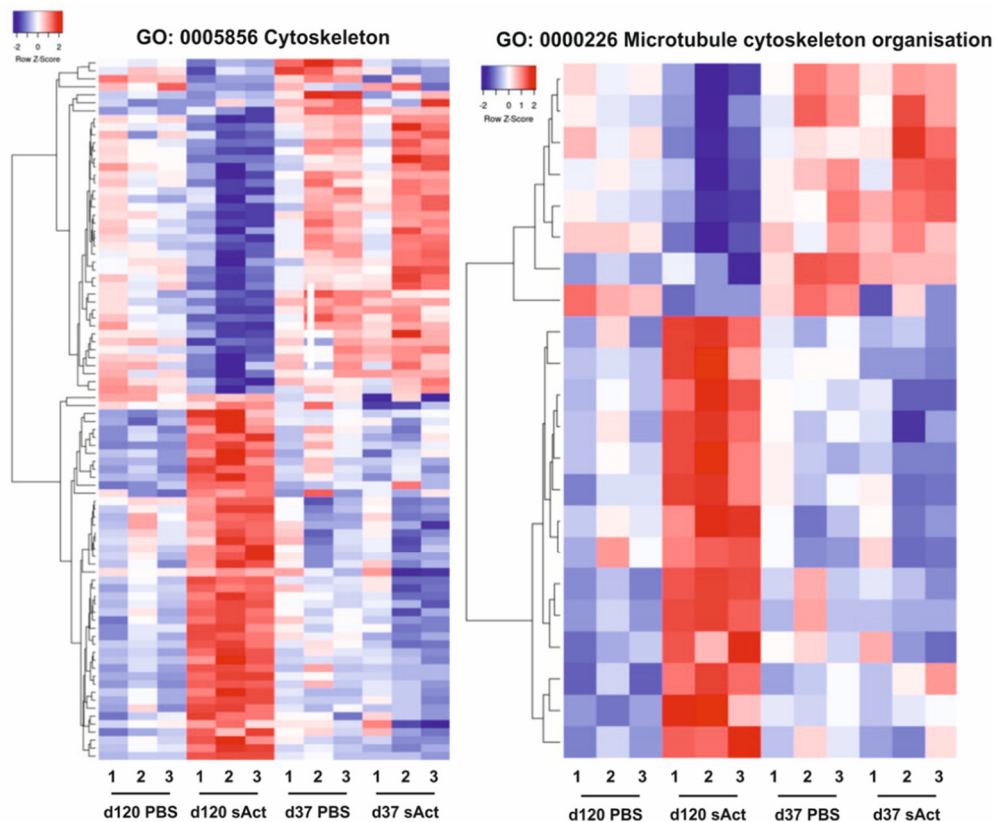

**Figure S4.** Heat map representations of differentially expressed transcripts within the Gene Ontology Categories `Cytoskeleton`, and `Microtubule cytoskeleton organisation`. Euclidean distance measures and average leaf clustering was applied to rows. The experimental conditions are indicated on the bottom. Each column represents one individual animal.

### Supplementary Figure 5

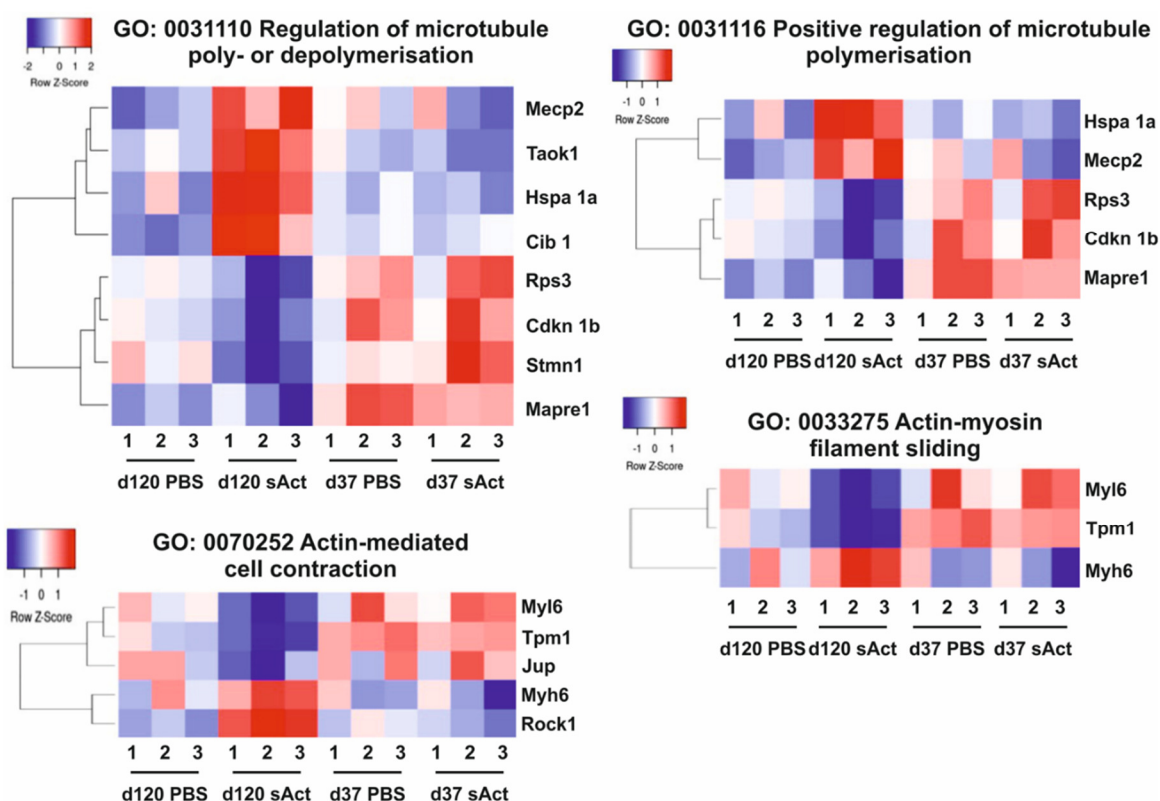

**Figure S5.** Heat map representations of differentially expressed transcripts within the Gene Ontology Categories `Regulation of microtubule poly- or depolymerization`, `Positive regulation of microtubule polymerization`, `Actin-mediated cell contraction`, and `Actin-myosin filament sliding`. Euclidean distance measures and average leaf clustering was applied to rows. The experimental conditions are indicated on the bottom. Each column represents one individual animal.

**Table S1. Antibody details**

| <b>Primary antibodies</b><br><b>Antigen</b>         | <b>Species</b> | <b>Dilution</b> | <b>Supplier</b>                    |
|-----------------------------------------------------|----------------|-----------------|------------------------------------|
| PCNA                                                | Mouse          | 1:200           | Cell signalling Technology #25865  |
| PLZF (D-9)                                          | Mouse          | 1:250           | Santa Cruz Biotechnology #sc-28319 |
| Stra8                                               | Rabbit         | 1:1000          | Abcam ab49405                      |
| Sox9                                                | Rabbit         | 1:1000          | Abcam ab185966                     |
| AQP3                                                | Rabbit         | 1:800           | Abcam ab125219                     |
| Phospho-Smad2<br>(Ser465/467)/Smad3<br>(Ser423/425) | Rabbit         | 1:1000          | Cell signalling Technology #8828   |
| Smad2/Smad3                                         | Rabbit         | 1:1000          | Cell signalling Technology #3102   |
| Phospho-AKT (Ser473)                                | Rabbit         | 1:1000          | Cell signalling Technology #4060   |
| AKT                                                 | Rabbit         | 1:1000          | Cell signalling Technology #9272   |
| Phospho-p44/42 MAPK<br>(Erk1/2) (Thr202/Tyr204)     | Rabbit         | 1:1000          | Cell signalling Technology #9101   |
| p44/42 MAPK (Erk1/2)                                | Rabbit         | 1:1000          | Cell signalling Technology #4695   |
| Alpha-tubulin                                       | Mouse          | 1:1000          | Cell signalling Technology #3873s  |
| PARP                                                | Rabbit         | 1:100           | Abcam ab32064                      |

| <b>Secondary antibodies</b> | <b>Species</b> | <b>Dilution</b> | <b>Supplier</b>                  |
|-----------------------------|----------------|-----------------|----------------------------------|
| AlexaFluor 488 anti-mouse   | Goat           | 1:200           | Invitrogen                       |
| Rabbit anti mouse IgG HRP   | Rabbit         | 1:200           | DAKO #PO260                      |
| Goat anti-rabbit IgG HRP    | Goat           | 1:5000          | ThermoFisher scientific #65-6120 |

**Table S2. The top 25 (as determined by cumulative correlation and significance score) anti-correlating CMAP-derived drugs for both Day 37 and 120 samples.**

| Rank | Day 37 CMAP-derived compound | Correlation | Significance | Day 120 CMAP-derived compound | Correlation | Significance |
|------|------------------------------|-------------|--------------|-------------------------------|-------------|--------------|
| 1    | mebeverine                   | -0.31       | 2.89         | irinotecan                    | -0.12       | 3.74         |
| 2    | benfluorex                   | -0.32       | 2.8          | ellipticine                   | -0.12       | 3.58         |
| 3    | BAS-012416453                | -0.31       | 2.75         | GW-8510                       | -0.1        | 3.53         |
| 4    | chlorhexidine                | -0.25       | 2.74         | daunorubicin                  | -0.12       | 3.48         |
| 5    | idoxuridine                  | -0.3        | 2.64         | equilin                       | -0.18       | 3.39         |
| 6    | perhexiline                  | -0.25       | 2.59         | estriol                       | -0.12       | 3.35         |
| 7    | NU-1025                      | -0.24       | 2.56         | flufenamic_acid               | -0.16       | 3.33         |
| 8    | cefotiam                     | -0.21       | 2.49         | cloperastine                  | -0.12       | 3.28         |
| 9    | Prestwick-981                | -0.23       | 2.49         | clemizole                     | -0.13       | 3.28         |
| 10   | mianserin                    | -0.27       | 2.46         | propafenone                   | -0.13       | 3.27         |
| 11   | saquinavir                   | -0.31       | 2.44         | benzonatate                   | -0.2        | 3.27         |
| 12   | foliosidine                  | -0.3        | 2.42         | carbachol                     | -0.12       | 3.25         |
| 13   | hexylcaine                   | -0.32       | 2.41         | picotamide                    | -0.19       | 3.24         |
| 14   | wortmannin                   | -0.16       | 2.37         | Prestwick-967                 | -0.23       | 3.23         |
| 15   | fursultiamine                | -0.37       | 2.35         | sodium_phenylbutyrate         | -0.17       | 3.23         |
| 16   | clemastine                   | -0.19       | 2.35         | pramocaine                    | -0.22       | 3.21         |
| 17   | Prestwick-1082               | -0.17       | 2.34         | fluorometholone               | -0.13       | 3.18         |
| 18   | niclosamide                  | -0.22       | 2.33         | camptothecin                  | -0.09       | 3.15         |
| 19   | fluorouracil                 | -0.24       | 2.3          | valproic_acid                 | -0.1        | 3.15         |
| 20   | etilefrine                   | -0.3        | 2.29         | xylometazoline                | -0.14       | 3.12         |
| 21   | 5252917                      | -0.19       | 2.29         | rofecoxib                     | -0.21       | 3.09         |
| 22   | hydroxyzine                  | -0.35       | 2.26         | cortisone                     | -0.12       | 3            |
| 23   | N6-methyladenosine           | -0.24       | 2.25         | resveratrol                   | -0.11       | 2.97         |
| 24   | lisinopril                   | -0.19       | 2.23         | hydrastine_hydrochloride      | -0.15       | 2.96         |
| 25   | ifosfamide                   | -0.27       | 2.22         | 6-azathymine                  | -0.11       | 2.96         |
